# Supplementary material
Source: PubMed Central journal article supplement (PMC7642148)
Supplement: NIHMS1616697-supplement-1.pdf [file NIHMS1616697-supplement-1.pdf]

**Supplementary Table 1: 24 Hour Blood Pressure Monitoring – Excluding Hypertensive Subjects**

| <b>CHARACTERISTICS</b>  | <b>SLE<br/>(n =14)</b> | <b>CONTROLS<br/>(n =24)</b> | <b>P – value</b> |
|-------------------------|------------------------|-----------------------------|------------------|
| Office SBP mm Hg        | 117 (107 – 128)        | 121 (117 – 127)             | 0.28             |
| Office DBP mm Hg        | 71 (66 – 88)           | 79 (71 – 86)                | 0.17             |
| 24h Systolic BP         | 116 (107 – 130)        | 116 (110 – 121)             | 0.79             |
| 24h Diastolic BP        | 73 (68 – 82)           | 71 (64 – 75)                | 0.21             |
| Awake Systolic BP       | 117 (112 – 134)        | 119 (115 – 125)             | 0.90             |
| Awake Diastolic BP      | 76 (69 – 89)           | 75 (69 – 79)                | 0.39             |
| Sleep Systolic BP       | 106 (98 – 123)         | 104 (97 – 111)              | 0.33             |
| Sleep Diastolic BP      | 64 (56 – 69)           | 58 (52 – 66)                | 0.17             |
| Percent nocturnal dip % | 7.8 (5.6-12.9)         | 12.0 (8.0-18.8)             | 0.09             |
| Non-Dipper              | 7 (50.0)               | 9 (45.0)                    | 1.0              |

SBP: systolic blood pressure, DBP: diastolic blood pressure, non-dipper defined as subjects with < 10% nocturnal dip.

## Supplemental Table 2: Biomarkers in Olink Inflammation Panel with Abbreviations

Adenosine Deaminase (ADA)

Artemin (ARTN)

Axin-1 (AXIN1)

Beta-nerve growth factor (Beta-NGF)

C-C motif chemokine 19 (CCL19)

C-C motif chemokine 20 (CCL20)

C-C motif chemokine 23 (CCL23)

C-C motif chemokine 25 (CCL25)

C-C motif chemokine 28 (CCL28)

C-C motif chemokine 3 (CCL3)

C-C motif chemokine 4 (CCL4)

C-X-C motif chemokine 1 (CXCL1)

C-X-C motif chemokine 10 (CXCL10)

C-X-C motif chemokine 11 (CXCL11)

C-X-C motif chemokine 5 (CXCL5)

C-X-C motif chemokine 6 (CXCL6)

C-X-C motif chemokine 9 (CXCL9)

Caspase-8 (CASP-8)

CD40L receptor (CD40)

CUB domain-containing protein 1 (CDCP1)

Cystatin D (CST5)

Delta and Notch-like epidermal growth factor-related receptor (DNER)

Eotaxin (CCL11)

Eukaryotic translation initiation factor 4E-binding protein 1 (4E-BP1)

Fibroblast growth factor 19 (FGF-19)

Fibroblast growth factor 21 (FGF21)

Fibroblast growth factor 23 (FGF-23)

Fibroblast growth factor 5 (FGF-5)

Fms-related tyrosine kinase 3 ligand (Flt3L)

Fractalkine (CX3CL1)

Glial cell line-derived neurotrophic factor (GDNF)

Hepatocyte growth factor (HGF)

Interferon gamma (IFN-gamma)

Interleukin-1 alpha (IL-1 alpha)

Interleukin-10 (IL10)

Interleukin-10 receptor subunit alpha (IL-10RA)

Interleukin-10 receptor subunit beta (IL-10RB)

Interleukin-12 subunit beta (IL-12B)

Interleukin-13 (IL-13)

Interleukin-15 receptor subunit alpha (IL-15RA)

Interleukin-17A (IL-17A)

Interleukin-17C (IL-17C)

Interleukin-18 (IL-18)

Interleukin-18 receptor 1 (IL-18R1)

Interleukin-2 (IL-2)

Interleukin-2 receptor subunit beta (IL-2RB)

Interleukin-20 (IL-20)

Interleukin-20 receptor subunit alpha (IL-20RA)

Interleukin-22 receptor subunit alpha-1 (IL-22 RA1)

Interleukin-24 (IL-24)

Interleukin-33 (IL-33)

Interleukin-4 (IL-4)

Interleukin-5 (IL5)

Interleukin-6 (IL6)

Interleukin-7 (IL-7)

Interleukin-8 (IL-8)

Latency-associated peptide transforming growth factor beta-1 (LAP TGF-beta-1)

Leukemia inhibitory factor (LIF)

Leukemia inhibitory factor receptor (LIF-R)

Macrophage colony-stimulating factor 1 (CSF-1)

Matrix metalloproteinase-1 (MMP-1)

Matrix metalloproteinase-10 (MMP-10)

Monocyte chemotactic protein 1 (MCP-1)

Monocyte chemotactic protein 2 (MCP-2)

Monocyte chemotactic protein 3 (MCP-3)

Monocyte chemotactic protein 4 (MCP-4)

Natural killer cell receptor 2B4 (CD244)

Neurotrophin-3 (NT-3)

Neurturin (NRTN)

Oncostatin-M (OSM)

Osteoprotegerin (OPG)

Programmed cell death 1 ligand 1 (PD-L1)

Protein S100-A12 (EN-RAGE)

Signaling lymphocytic activation molecule (SLAMF1)

SIR2-like protein 2 (SIRT2)

STAM-binding protein (STAMBP)

Stem cell factor (SCF)

Sulfotransferase 1A1 (ST1A1)

T cell surface glycoprotein CD6 isoform (CD6)

T-cell surface glycoprotein CD5 (CD5)

T-cell surface glycoprotein CD8 alpha chain (CD8A)

Thymic stromal lymphopoietin (TSLP)

TNF-beta (TNFB)

TNF-related activation-induced cytokine (TRANCE)

TNF-related apoptosis-inducing ligand (TRAIL)

Transforming growth factor alpha (TGF-alpha)

Tumor necrosis factor (Ligand) superfamily, member 12 (TWEAK)

Tumor necrosis factor (TNF)

Tumor necrosis factor ligand superfamily member 14 (TNFSF14)

Tumor necrosis factor receptor superfamily member 9 (TNFRSF9)

Urokinase-type plasminogen activator (uPA)

Vascular endothelial growth factor A (VEGF-A)
